# Supplementary material for: Structural plasticity of calmodulin on the surface of CaF2nanoparticles preserves its biological function
Source: Royal Society of Chemistry journal article supplement (doi:10.1039/c4nr04368e), 2014-10-13
Supplement: c4nr04368e1.pdf [file c4nr04368e1.pdf]

## Electronic Supplementary Information

### **Structural plasticity of calmodulin on the surface of CaF<sub>2</sub> nanoparticles preserves its biological function**

Alessandra Astegno, Elena Maresi, Valerio Marino, Paola Dominici, Marco Pedroni, Fabio Piccinelli and Daniele Dell'Orco

### **Supplementary Methods**

#### **Protein expression and purification**

Expression was performed by adding 0.4 mM IPTG to 1 liter of BL21(DE3)[pET12b-AtCaM1] bacterial culture grown in LB medium containing 100 µg/mL ampicillin to exponential phase and incubating at 30 °C for 4-5 hours. Bacterial cells were pelleted and resuspended in 50 mL of extraction buffer (50 mM Tris-HCl pH 7.5, 2 mM EDTA) and frozen. After thawing, 1 mM DTT and 0.1 mg/mL lysozyme were added; the lysate was incubated 30 minutes in ice and sonicated briefly to shear the bacterial DNA. Cell debris was removed by centrifugation at 15,000 xg for 30 min at 4°C. A first precipitation step was obtained by adding ammonium sulphate at 55% saturation. After precipitate removal by centrifugation at 27,000 xg for 30 min at 4°C, few drops of 10% H<sub>2</sub>SO<sub>4</sub> were added to the final pH value of 4. The precipitated protein was collected by another centrifugation step and resuspended in 15 mL of 50 mM Tris-HCl pH 7.5, 1 mM DTT. The sample was then dialyzed extensively firstly against double-distilled water and then against dialysis buffer (10 mM Tris-HCl, 100 mM NaCl, 0.5 mM EGTA, 1 mM DTT). The clarified sample was charged with 5 mM CaCl<sub>2</sub> and applied to a Phenyl-Sepharose (GE Healthcare) column equilibrated with Equilibration/Wash buffer I (50 mM Tris-HCl pH 7.5, 0.5 mM CaCl<sub>2</sub>, 1 mM DTT). The column was washed with Equilibration/Wash buffer I and with Wash buffer II (50 mM Tris-HCl pH 7.5, 0.5 mM CaCl<sub>2</sub>, 1 mM DTT, 200 mM NaCl). CaM1 was eluted with Elution buffer (50 mM Tris-HCl pH 7.5, 1 mM EGTA, 1

mM DTT). The purity of CaM1 was estimated by SDS-PAGE analysis and the protein concentration was determined by the Bradford assay.<sup>1</sup>

### **Estimate of the size-dependent protein coverage of NP surface and concentration adjustments**

The maximum number of proteins bound to each NP depends on the surface of the NP accessible to proteins and on the surface of the NP occupied by a bound protein. Based on the simplest geometric model of interaction and considering all the objects as rigid spheres, the maximal stoichiometric protein/NP ratio to ensure a minimal presence of unbound proteins in solution is:

$$N_{CaM1}^{max} = \frac{4\pi(r_{NP} + r_{CaM1})^2}{\pi r_{CaM1}^2} \quad (1)$$

where  $N_{CaM1}^{max}$  is the maximum number of CaM1 molecules that can occupy the surface of the NP,  $r_{NP}$  is the radius of the NP and  $r_{CaM1}$  is the radius of CaM1. In other words, the geometric problem is that of occupying the augmented surface area of a sphere by  $N_{CaM1}^{max}$  circles, each of area  $\pi r_{CaM1}^2$ .

Also, assuming that the density of  $CaF_2$  NPs is equal to that of bulk  $CaF_2$  ( $\rho = 3.18 \text{ g/cm}^3$ ), the molecular weight of  $CaF_2$  NPs ( $NP$  in the equation) was calculated as follows:

$$MW_{NP} = \frac{4\pi r_{NP}^3}{3} \cdot \rho_{CaF_2} \cdot N_A \quad (2)$$

For example, in the presence of NPs with a diameter of 25 nm,  $N_{CaM1}^{max} = 144$ , and the molecular weight of  $CaF_2$  NPs is  $15.5 \cdot 10^6 \text{ g/mol}$ . For near-UV CD spectra with reasonable signal-to-noise ratio, approximately 59  $\mu\text{M}$  ( $\sim 1 \text{ mg mL}^{-1}$ ) CaM1 is required, so that 0.41  $\mu\text{M}$  is the concentration of saturating  $CaF_2$  NPs ( $6.35 \text{ mg mL}^{-1}$ ) which, under the maximal binding geometric assumption, guarantees the amount of free CaM1 to keep low.

## **Thermal denaturation profiles**

Thermal denaturation of CaM1 both alone and in the presence of CaF<sub>2</sub> NPs was monitored from 20-96 °C using the same conditions and concentration range as for far-UV spectra. The ellipticity signal at 208 nm ( $\theta_{208}$ ) was recorded at a scan rate of 1 °C min<sup>-1</sup> and a response time of 4 sec, using a 0.1 cm quartz cuvette. Thermally denatured samples were cooled to 25 °C and, after 5-15 min, the far-UV CD spectrum was recorded to check for residual structures (results not shown).

## **Calculation of the Ca<sup>2+</sup> concentration within the nanocrystal of the synthesized CaF<sub>2</sub> NPs**

Cell volume = 163.13 Å<sup>3</sup> Number of Ca<sup>2+</sup> within the unit cell = Z = 4

$$4/163.13 \text{ Å}^3 = 2.45 \cdot 10^{-2} \text{ ions/ Å}^3 = 2.45 \cdot 10^{25} \text{ ions/L} = 2.45 \cdot 10^{25} / N_A \text{ mol/L (M)} \sim 41 \text{ M}$$

## **Dynamic Light Scattering experiments**

DLS measurements were performed with a Zetasizer Nano-S (Malvern Instruments) using a polystyrene low volume disposable sizing cuvette (ZEN0112). Viscosity and Refractive Index were set at 0.8872 cP and 1.330 respectively (default values for water), temperature was set to 25 °C with 2 min equilibration time. The measurement angle was 173° backscatter and the analysis model was set to multiple narrow modes. For each measurement a minimum of 7 determinations were performed, each consisting of 13-15 repetitions. Buffers (5 mM Tris-HCl, pH 7.5, 150 mM KCl, adjusted with CaCl<sub>2</sub> or EGTA), were filtered through a Jet Biofilm 0.22 mm membrane, while protein-only solutions were filtered through an Anotop 10 filter (Whatman, 0.02 µm).

# Supplementary Figures

**Figure S1**

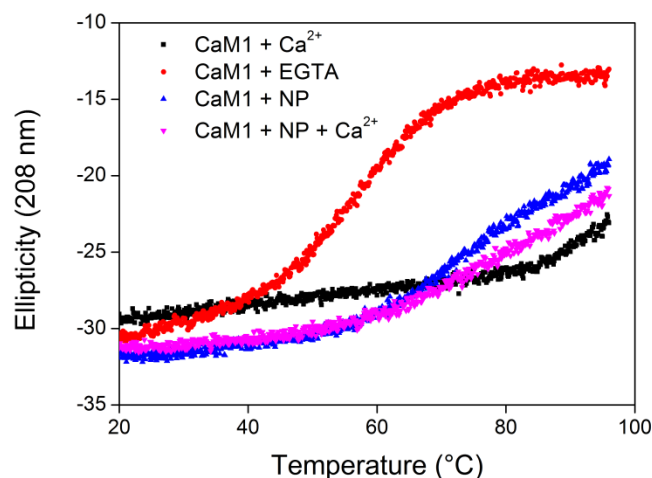

**Figure S1.** Thermal denaturation profiles of CaM1 in the presence and absence of  $\text{CaF}_2$  NPs. Thermal denaturation profiles of  $\sim 12 \mu\text{M}$  CaM1 in the presence of 1 mM EGTA or  $\text{Ca}^{2+}$ , with or without incubation with  $1.4 \text{ mg mL}^{-1}$   $\text{CaF}_2$  NPs. Thermal denaturation was followed by monitoring the ellipticity signal at 208 nm over 20–96 °C.

**Figure S2**

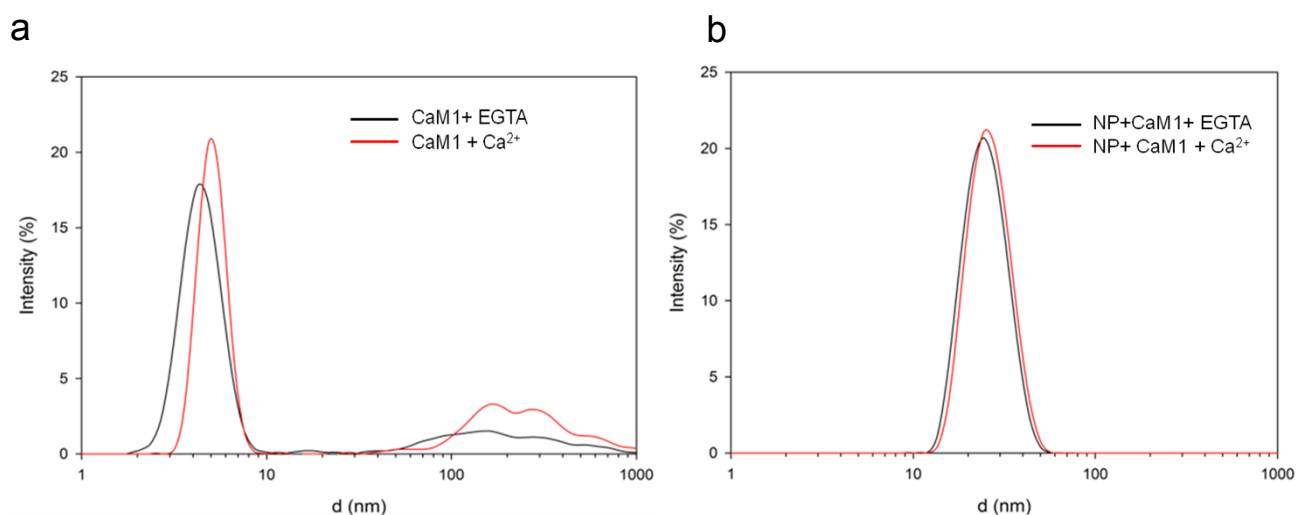

**Figure S2.** Hydrodynamic diameter measurements of CaM1 upon binding of  $\text{Ca}^{2+}$  and upon interaction with  $\text{CaF}_2$  NPs. All measurements were performed at  $T = 25 \text{ }^\circ\text{C}$  in 5 mM Tris-HCl pH 7.5, 150 mM KCl buffer. a) Size distributions of  $40 \mu\text{M}$  CaM1 in the presence of 1 mM EGTA and 1 mM  $\text{Ca}^{2+}$ . Hydrodynamic diameter of CaM1 in the presence of saturating EGTA is  $4.5 \pm 0.3 \text{ nm}$  while in the presence of saturating  $\text{Ca}^{2+}$  is  $5.1 \pm 0.3 \text{ nm}$ . b) Size distributions of  $60 \mu\text{M}$  CaM1 incubated with 7 mg

mL<sup>-1</sup> CaF<sub>2</sub> NPs in the presence of equal amounts of saturating EGTA or Ca<sup>2+</sup>. Hydrodynamic diameter of NPs + CaM1 mixture is 26.8 ± 0.7 nm in the presence of saturating Ca<sup>2+</sup> and 25.5 ± 0.5 nm in the presence of saturating EGTA .

**Figure S3**

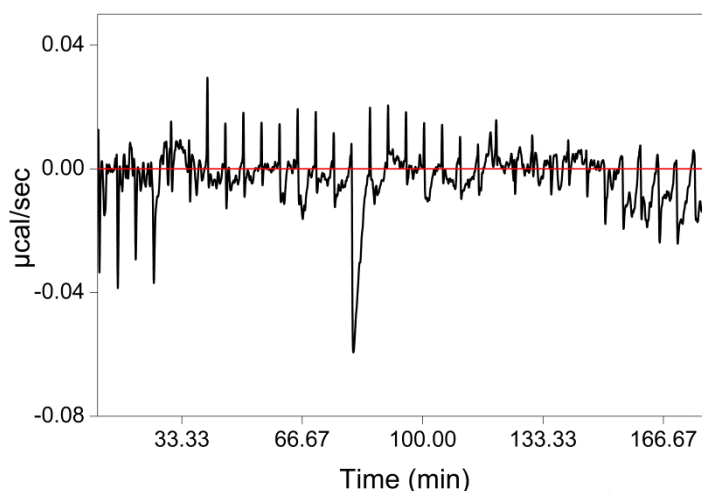

**Figure S3.** ITC raw data for titration of CaM1 EE105-141QQ in a solution of CaF<sub>2</sub> NPs in 5 mM Tris-HCl, 150 mM KCl, pH 7.5 at 25 °C. The particle concentration in the cell (0.2 mL) was 240 nM, and the protein concentration in the syringe was 190 μM.

**Figure S4**

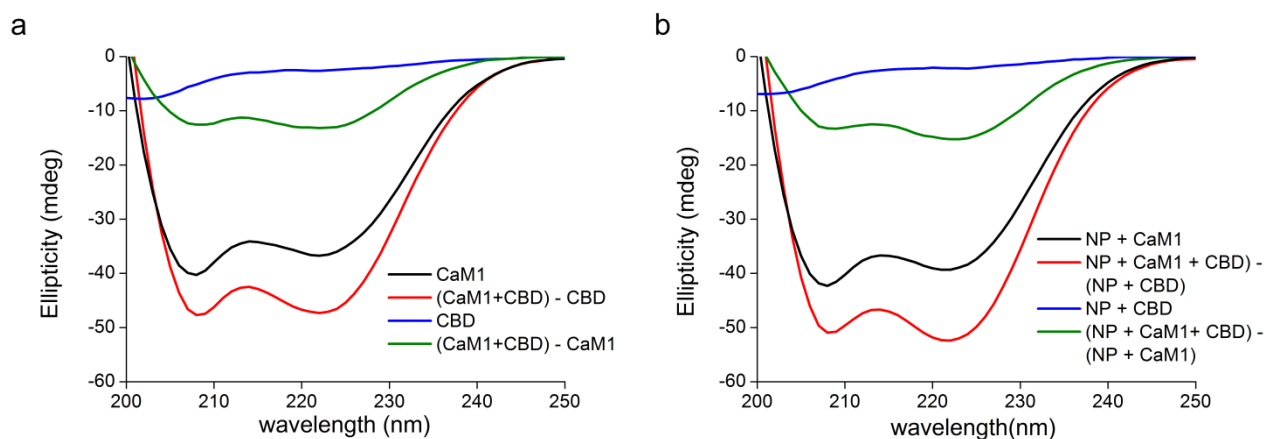

**Figure S4.** Far-UV CD spectra of CaM1, CBD peptide, and CaM1-CBD complex in the absence of added Ca<sup>2+</sup> without (a) and with (b) CaF<sub>2</sub> NPs. All measurements were performed at 25 °C in 5 mM Tris-HCl pH 7.5, 150 mM KCl buffer. For the far-UV CD spectra 12 μM CaM1 and 24 μM peptide were used, alone (a) and incubated (b) with 1.4 mg mL<sup>-1</sup> CaF<sub>2</sub> NPs.

1. Bradford, M. M., A Rapid and Sensitive Method for the Quantitation of Microgram Quantities of Protein Utilizing the Principle of Protein-Dye Binding. *Anal Biochem* **1976**, 72, 248-54.
